# Supplementary material for: Impact on Epidemic Measles of Vaccination Campaigns Triggered by Disease Outbreaks or Serosurveys: A Modeling Study
Source: PLOS journal article supplement (doi:10.1371/journal.pmed.1002144), 2016-10-11
Supplement: S5 (10.1371/journal.pmed.1002144.s005) [file journal.pmed.1002144.s005]

| Country     | Birth Rate (per 1000) | Routine Vaccination Rate | Pop Pyramid (1-90 years)                                                            |
|-------------|-----------------------|--------------------------|-------------------------------------------------------------------------------------|
| Yemen-like  | 38                    | 73%                      |  |
| Niger-like  | 48                    | 71%                      |  |
| Nepal-like  | 24                    | 86%                      |  |
| Zambia-like | 46                    | 91%                      |  |
